# Supplementary material for: Exploration of CTCF post-translation modifications uncovers Serine-224 phosphorylation by PLK1 at pericentric regions during the G2/M transition
Source: eLife. 2019 Jan 24;8:e42341. doi: 10.7554/eLife.42341 (PMC6361588; doi:10.7554/eLife.42341)
Supplement: Supplementary file 1. [file elife-42341-supp1.xlsx]

## Sheet: Table 1
Table 1 - Antibodies and reagents used in this study
Description	Vendor	Catalog #	Usage
Rabbit anti-CTCF, clone D31H2	Cell Signaling Technology	#3418	Western Blot, Immunofluoresence, ChIP-seq
Normal rabbit IgG	Cell Signaling Technology	#2729	Immunofluoresence
Rabbit anti-Phospho-CTCF (Ser224)	Cell Signaling Technology	This study	Western Blot, Immunofluoresence, ChIP-seq
Mouse anti-FLAG clone M2	Sigma-Aldrich	F3165	Western Blot, Immunofluoresence
Mouse anti-PCNA clone PC10	Cell Signaling Technology	#2586	Immunofluoresence
Rat anti-H3S10ph clone 6G8B7	Active Motif	61623	Immunofluoresence
Rabbit anti-GAPDH clone D16H11	Cell Signaling Technology	#5174	Western Blot
Mouse anti-B23 clone FC82291	Sigma-Aldrich	B0556	Immunofluoresence
Mouse anti-H3K27me3 clone 0323	Active Motif	61017	Immunofluoresence
Mouse anti-H3K9me3 clone 6F12-H4	Sigma-Aldrich	05-1242	Immunofluoresence
Mouse anti-B-actin clone AC-15	Sigma-Aldrich	A1978	Western Blot
Goat anti-mouse IgG, HRP conjugate	Promega	W4021	Western Blot
Goat anti-rabbit IgG, HRP conjugate	Promega	W4011	Western Blot
Goat anti-rabbit IgG, Alexa Fluor 555 conjugate	Thermo Fisher	A21428	Immunofluoresence
Goat anti-mouse IgG, Alexa Fluor 488 conjugate	Thermo Fisher	A11029	Immunofluoresence
Goat anti-rat IgG, Alexa Fluor 647 conjugate	Thermo Fisher	A21247	Immunofluoresence
Goat anti-mouse IgG, Alexa Fluor 647 conjugate	Thermo Fisher	A21236	Immunofluoresence
Reagent	Vendor	Catalog #
Doxycycline	Sigma-Aldrich	D9891
Volasertib (BI 6727)	Selleck Chemicals	S2235
RO-3306	Selleck Chemicals	S7747
Colcemid	Thermo Fisher	15210040

## Sheet: Table 2
Table 2 - Oligonucleotides used in this study
Identifier	Use	Description	Sequence (5'-->3')
oBD64	EMSA	RS14C Forward	ctatgcattaggtttgggtgttatacccgtgtaggccagcagagggtgtcggatcccaaggaaaccaagttacagacgcc
oBD65	EMSA	RS14C Reverse	ggcgtctgtaacttggtttccttgggatccgacaccctctgctggcctacacgggtataacacccaaacctaatgcatag
oBD66	EMSA	RS14C Forward mutant	ctatgcattaggtttgggtgttatacccgtgtaggcTagcaCagTgtgtcggatcccaaggaaaccaagttacagacgcc
oBD67	EMSA	RS14C Reverse mutant	ggcgtctgtaacttggtttccttgggatccgacacActGtgctAgcctacacgggtataacacccaaacctaatgcatag
AK226	ChIP-qPCR	AK226 Cirbp F	CTCTGGTTTCCGTCAGTGATAA
AK227	ChIP-qPCR	AK227 Cirbp R	GACTCATGTCCCACCTCTTTC
AK230	ChIP-qPCR	AK230 Ccnd2 F	CTC TTT GCG TTC TAG GCA ATT C
AK231	ChIP-qPCR	AK231 Ccnd2 R	TGA ACT GAG CCC TTT GTG AG
AK166	ChIP-qPCR	AK166 Oct4 F	TAGGTGAGCCGTCTTTCCA
AK167	ChIP-qPCR	AK167 Oct4 R	GTGAGAAGGCGAAGTCTGAAG
AK304	ChIP-qPCR	AK304 Flna F	GGGTGTCCTAGCCTTAGAGT
AK305	ChIP-qPCR	AK305 Flna R	CTCATCTGGATCTTTGGGATGG
AK308	ChIP-qPCR	AK308 Irak1 F	GGGAGTCCCTAATGGGAGAA
AK309	ChIP-qPCR	AK309 Irak1 R	CCTGTTCAGCCCTATTCAGATG
AK312	ChIP-qPCR	AK312 Ikbkg F	CAGTCAGCAGTGCTCTCTTAT
AK313	ChIP-qPCR	AK313 Ikbkg R	AATCCTCAGCAGATCCACAAG

## Sheet: Table 3
Table 3 - UniProt accession numbers used in Clustal alignments
	CTCF	PLK1	ATM	GSK3B
Mouse	Q61164	Q07832	Q62388	Q9WV60
Rat	Q9R1D1	Q62673	D4ACL8	P18266
Human	P49711	P53350	Q13315	P49841
Chimpanzee	H2QBB9	G2HFG8	K7B6I0	K7CFX8
Opossum	F6QDS6	F7F258	F6YNZ6	F6PGQ1
Chicken	Q08705	Q5ZJ36	E1C0Q6	F1NPL8
Frog	Q6PF79	P70032	Q5MPF8	Q91757
Zebrafish	Q6JAA4	Q4KMI8	F1QJB6	Q9YH60
Sea Urchin	W4Y9Y1	W4YQ73	B0FWN6	W4ZIA0
Fruit Fly	Q9VS55	P52304	Q5EAK6	P18431
Water Flea	E9HLQ9	E9G7B9	E9GRN4	E9H6Q6
