# Supplementary material for: Exploration of CTCF post-translation modifications uncovers Serine-224 phosphorylation by PLK1 at pericentric regions during the G2/M transition
Source: eLife. 2019 Jan 24;8:e42341. doi: 10.7554/eLife.42341 (PMC6361588; doi:10.7554/eLife.42341)
Supplement: Supplementary file 2. [file elife-42341-supp2.xlsx]

## Sheet: Table 2
Table 2 - Oligonucleotides used in this study
Identifier	Use	Description	Sequence (5'-->3')
oBD64	EMSA	RS14C Forward	ctatgcattaggtttgggtgttatacccgtgtaggccagcagagggtgtcggatcccaaggaaaccaagttacagacgcc
oBD65	EMSA	RS14C Reverse	ggcgtctgtaacttggtttccttgggatccgacaccctctgctggcctacacgggtataacacccaaacctaatgcatag
oBD66	EMSA	RS14C Forward mutant	ctatgcattaggtttgggtgttatacccgtgtaggcTagcaCagTgtgtcggatcccaaggaaaccaagttacagacgcc
oBD67	EMSA	RS14C Reverse mutant	ggcgtctgtaacttggtttccttgggatccgacacActGtgctAgcctacacgggtataacacccaaacctaatgcatag
AK226	ChIP-qPCR	AK226 Cirbp F	CTCTGGTTTCCGTCAGTGATAA
AK227	ChIP-qPCR	AK227 Cirbp R	GACTCATGTCCCACCTCTTTC
AK230	ChIP-qPCR	AK230 Ccnd2 F	CTC TTT GCG TTC TAG GCA ATT C
AK231	ChIP-qPCR	AK231 Ccnd2 R	TGA ACT GAG CCC TTT GTG AG
AK166	ChIP-qPCR	AK166 Oct4 F	TAGGTGAGCCGTCTTTCCA
AK167	ChIP-qPCR	AK167 Oct4 R	GTGAGAAGGCGAAGTCTGAAG
AK304	ChIP-qPCR	AK304 Flna F	GGGTGTCCTAGCCTTAGAGT
AK305	ChIP-qPCR	AK305 Flna R	CTCATCTGGATCTTTGGGATGG
AK308	ChIP-qPCR	AK308 Irak1 F	GGGAGTCCCTAATGGGAGAA
AK309	ChIP-qPCR	AK309 Irak1 R	CCTGTTCAGCCCTATTCAGATG
AK312	ChIP-qPCR	AK312 Ikbkg F	CAGTCAGCAGTGCTCTCTTAT
AK313	ChIP-qPCR	AK313 Ikbkg R	AATCCTCAGCAGATCCACAAG
