# Supplementary material for: Exploration of CTCF post-translation modifications uncovers Serine-224 phosphorylation by PLK1 at pericentric regions during the G2/M transition
Source: eLife. 2019 Jan 24;8:e42341. doi: 10.7554/eLife.42341 (PMC6361588; doi:10.7554/eLife.42341)
Supplement: Supplementary file 3. [file elife-42341-supp3.xlsx]

## Sheet: Table 3
Table 3 - UniProt accession numbers used in Clustal alignments
	CTCF	PLK1	ATM	GSK3B
Mouse	Q61164	Q07832	Q62388	Q9WV60
Rat	Q9R1D1	Q62673	D4ACL8	P18266
Human	P49711	P53350	Q13315	P49841
Chimpanzee	H2QBB9	G2HFG8	K7B6I0	K7CFX8
Opossum	F6QDS6	F7F258	F6YNZ6	F6PGQ1
Chicken	Q08705	Q5ZJ36	E1C0Q6	F1NPL8
Frog	Q6PF79	P70032	Q5MPF8	Q91757
Zebrafish	Q6JAA4	Q4KMI8	F1QJB6	Q9YH60
Sea Urchin	W4Y9Y1	W4YQ73	B0FWN6	W4ZIA0
Fruit Fly	Q9VS55	P52304	Q5EAK6	P18431
Water Flea	E9HLQ9	E9G7B9	E9GRN4	E9H6Q6
